# Supplementary material for: Sensitive immunosensing of α-synuclein protein in human plasma samples using gold nanoparticles conjugated with graphene: an innovative immuno-platform towards early stage identification of Parkinson's disease using point of care (POC) analysis
Source: Royal Society of Chemistry journal article supplement (doi:10.1039/d1ra06437a), 2022-01-01
Supplement: d1ra06437a1.pdf [file d1ra06437a1.pdf]

## Supporting information

### **Sensitive immunosensing of $\alpha$ -Synuclein protein in human plasma samples using gold nanoparticle conjugated with graphene: An innovative immuno-platform towards early stage identification of Parkinson disease using point of care (POC) analysis**

Esmaeil Darvish Aminabad <sup>a,b1</sup>, Ahmad Mobed <sup>b,c1</sup>, Mohammad Hasanzadeh <sup>b,\*</sup>, Mohammad Ali Hosseinpour Feizi <sup>a,\*\*</sup>, Reza Safaralizadeh <sup>a□</sup>, Farzad Seidi <sup>d□□□□</sup>

<sup>a</sup> Department of Biology, Faculty of Natural Sciences, Tabriz University, Tabriz, Iran

<sup>b</sup> Pharmaceutical Analysis Recent Center, Tabriz University of Medical Sciences, Tabriz, Iran

<sup>c</sup> Physical Medicine and Rehabilitation Research Center, Tabriz University of Medical Sciences, Tabriz, Iran.

<sup>d</sup> Jiangsu Co-Innovation Center for Efficient Processing and Utilization of Forest Resources and International Innovation Center for Forest Chemicals and Materials, Nanjing Forestry University, Nanjing 210037, China.

<sup>1</sup> Co-first author: Equal contribution

#### **Corresponding author at:**

\*Pharmaceutical Analysis Recent Center, Tabriz University of Medical Sciences, Tabriz 51664, Iran.

[Hasanzadehm@tbzmed.ac.ir](mailto:Hasanzadehm@tbzmed.ac.ir)

\*\* Department of Biology, Faculty of Natural Sciences, Tabriz University, Tabriz, Iran

[MH-Faizi@ea-sciencepark.org.ir](mailto:MH-Faizi@ea-sciencepark.org.ir)

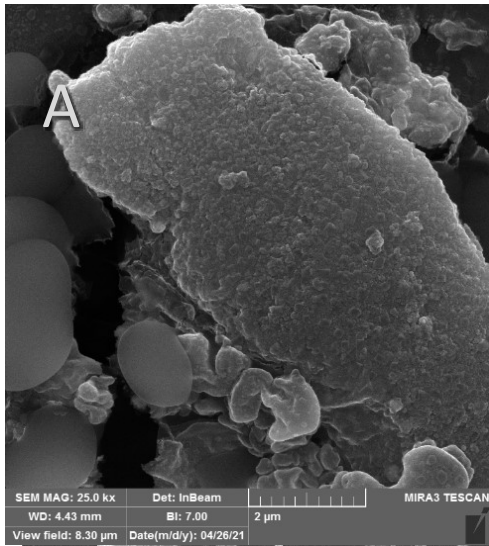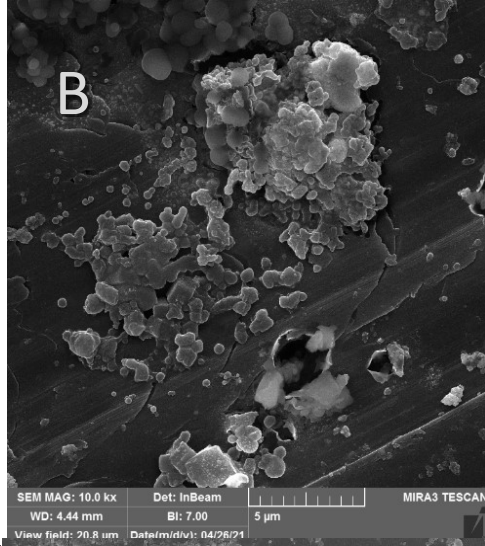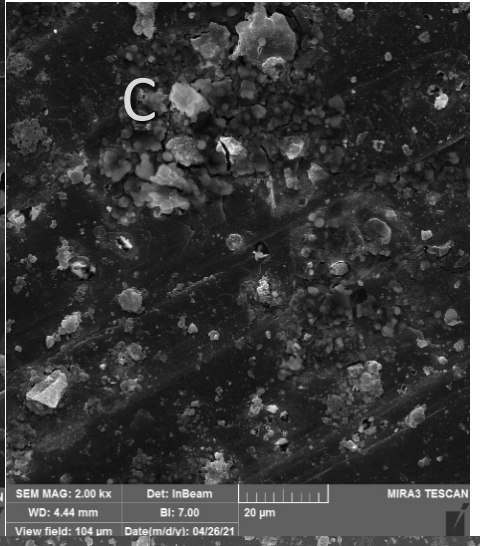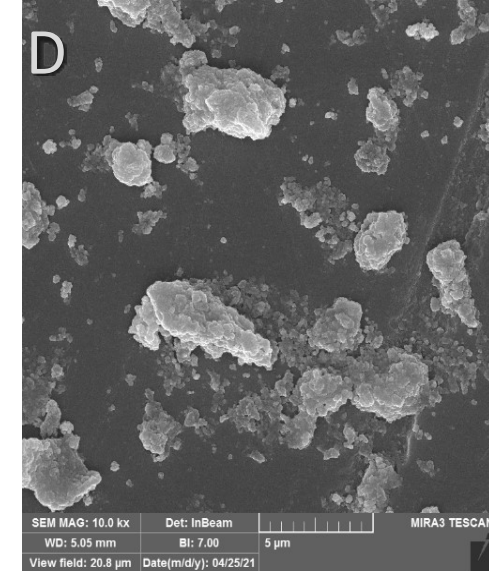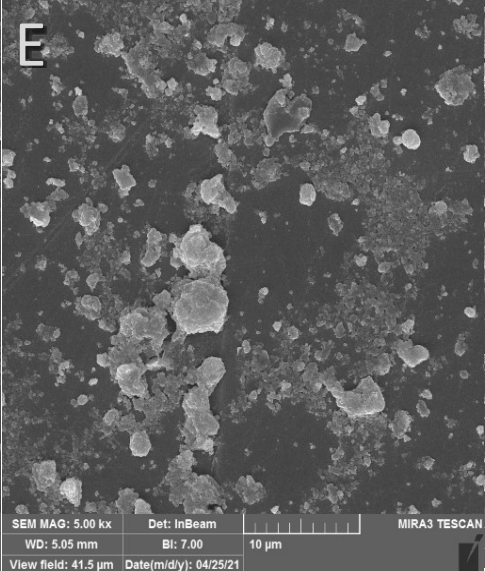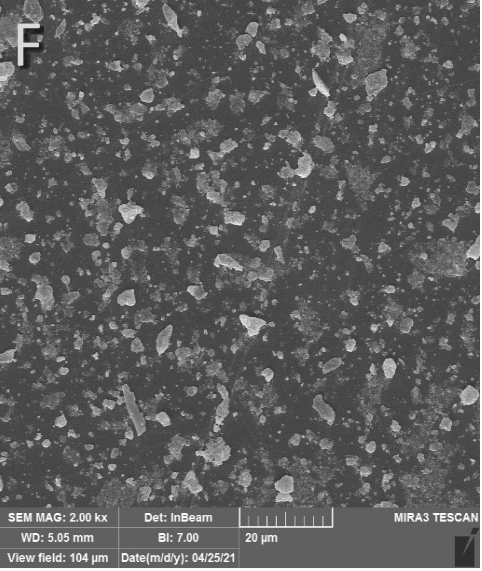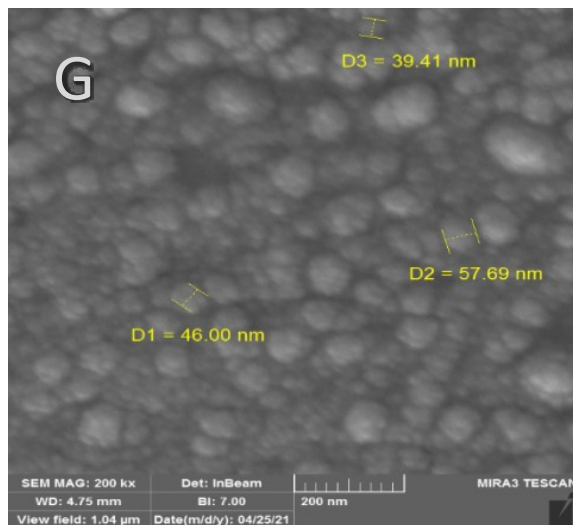

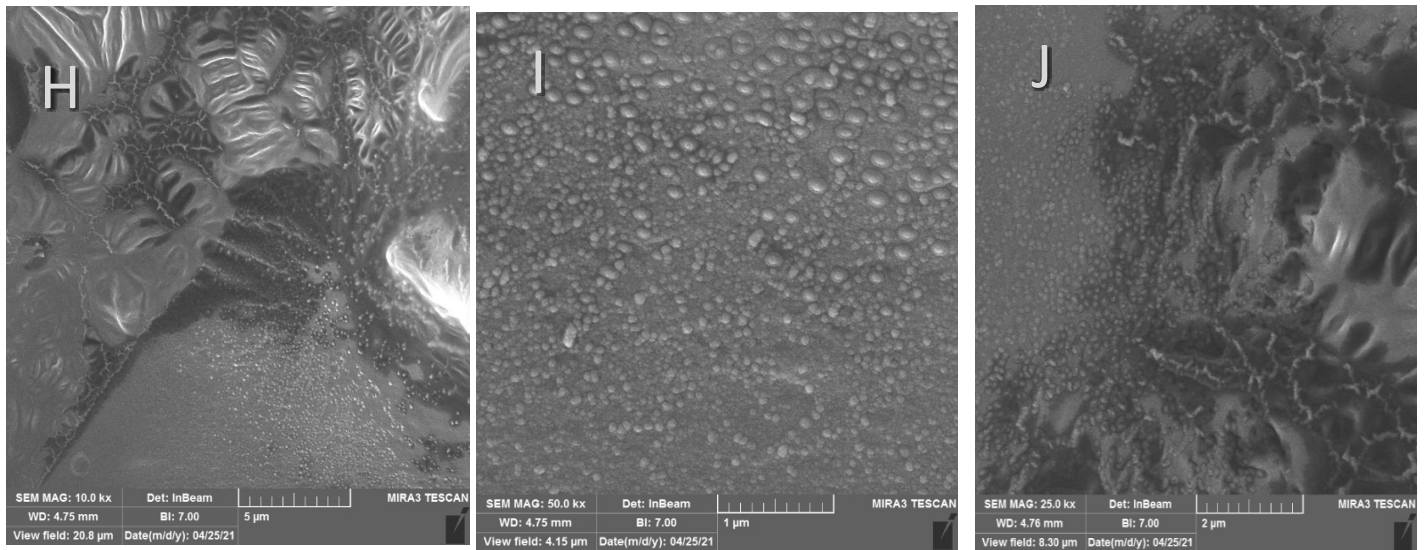

**Figure S1.** FE-SEM images of **A-C)** AuNCs, **D-F)** GC electrode/AuNCs, **G-J)** GC electrode/AuNCs/Ab and **K-M)** GC electrode/AuNCs/Ab/BSA/Antigen in different magnification.

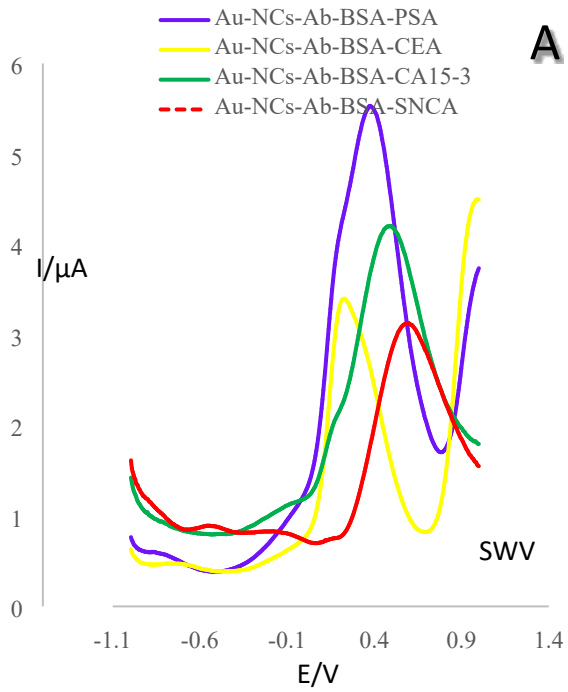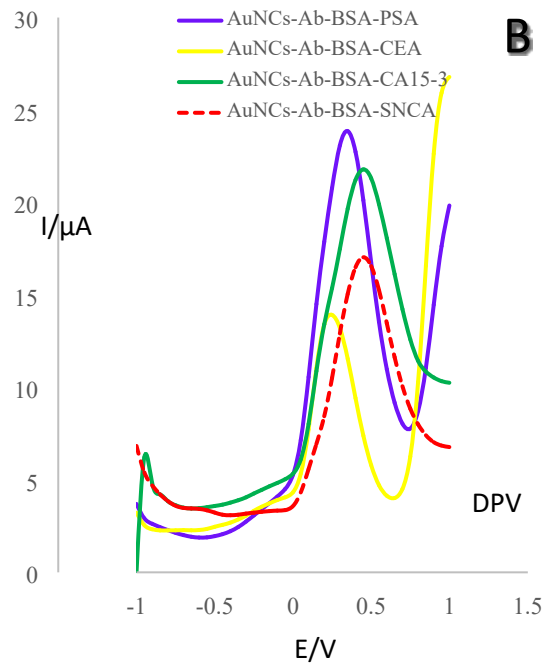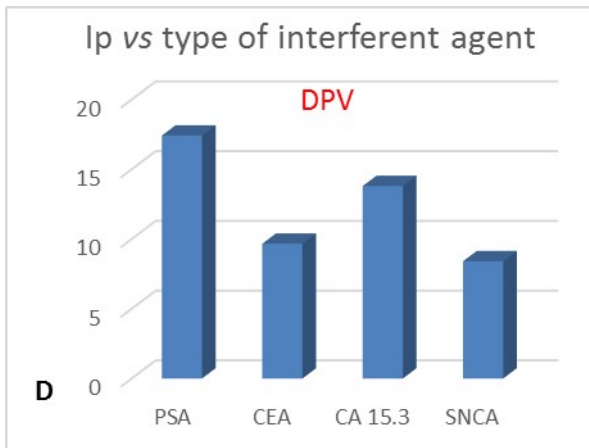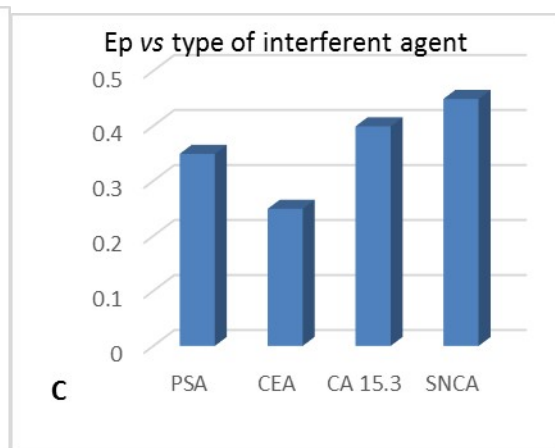

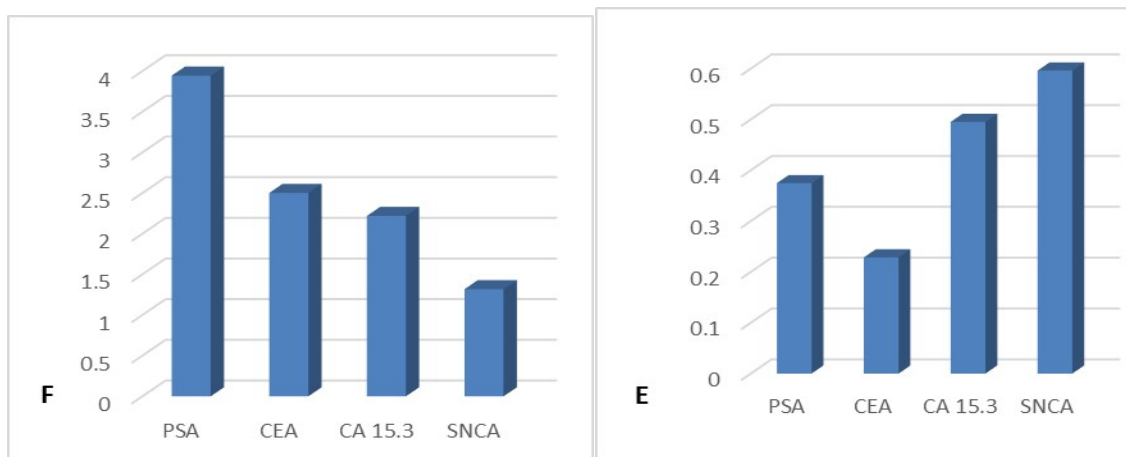

**Figure S2. A)** SWVs and **B)** DPVs of the designed immunosensor for hybridization by SNCA, CA 15.3, CEA and PSA in 0.01M  $[\text{Fe}(\text{CN})_6]^{3-/4-}/\text{KCl}$  solution **C-F)** and related histograms. ( $n=3$ ,  $Sd=2.53$ ).

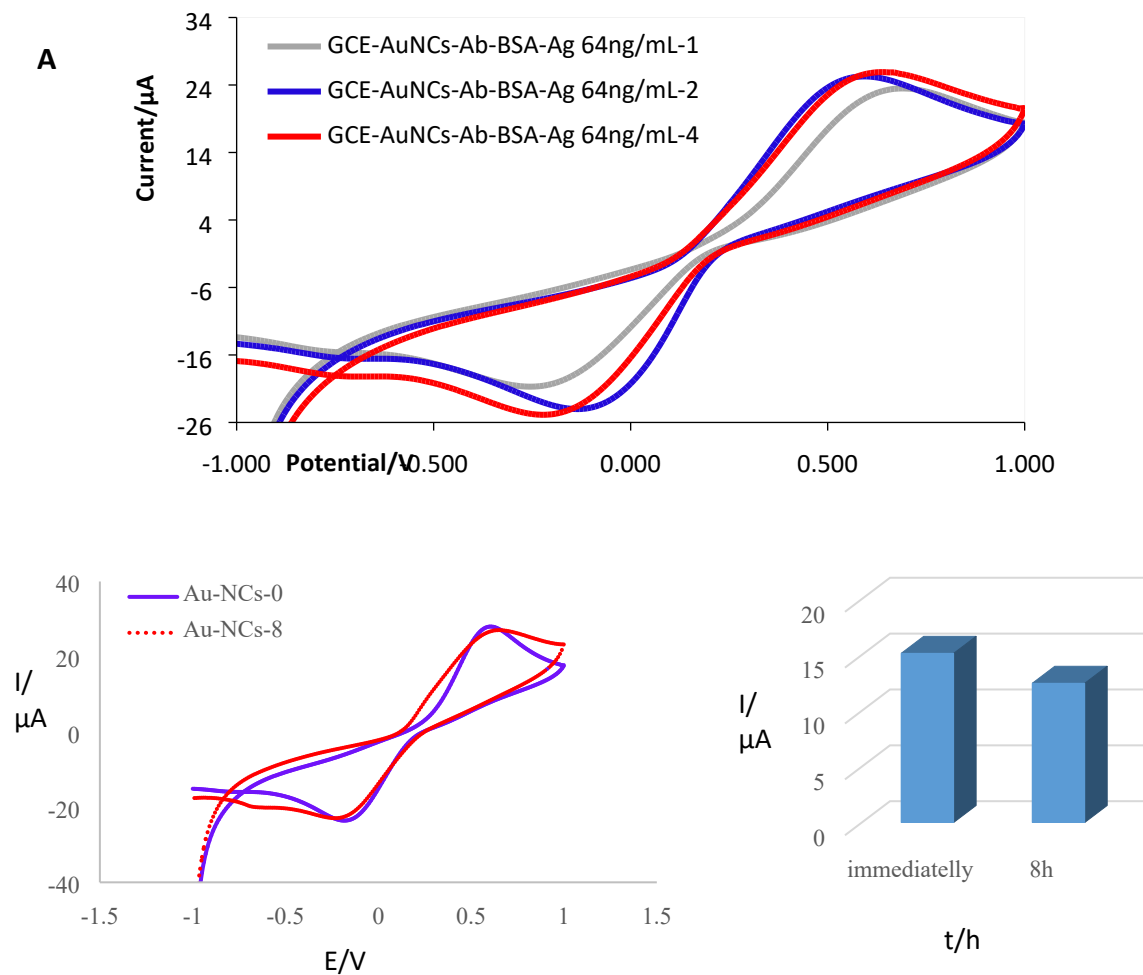

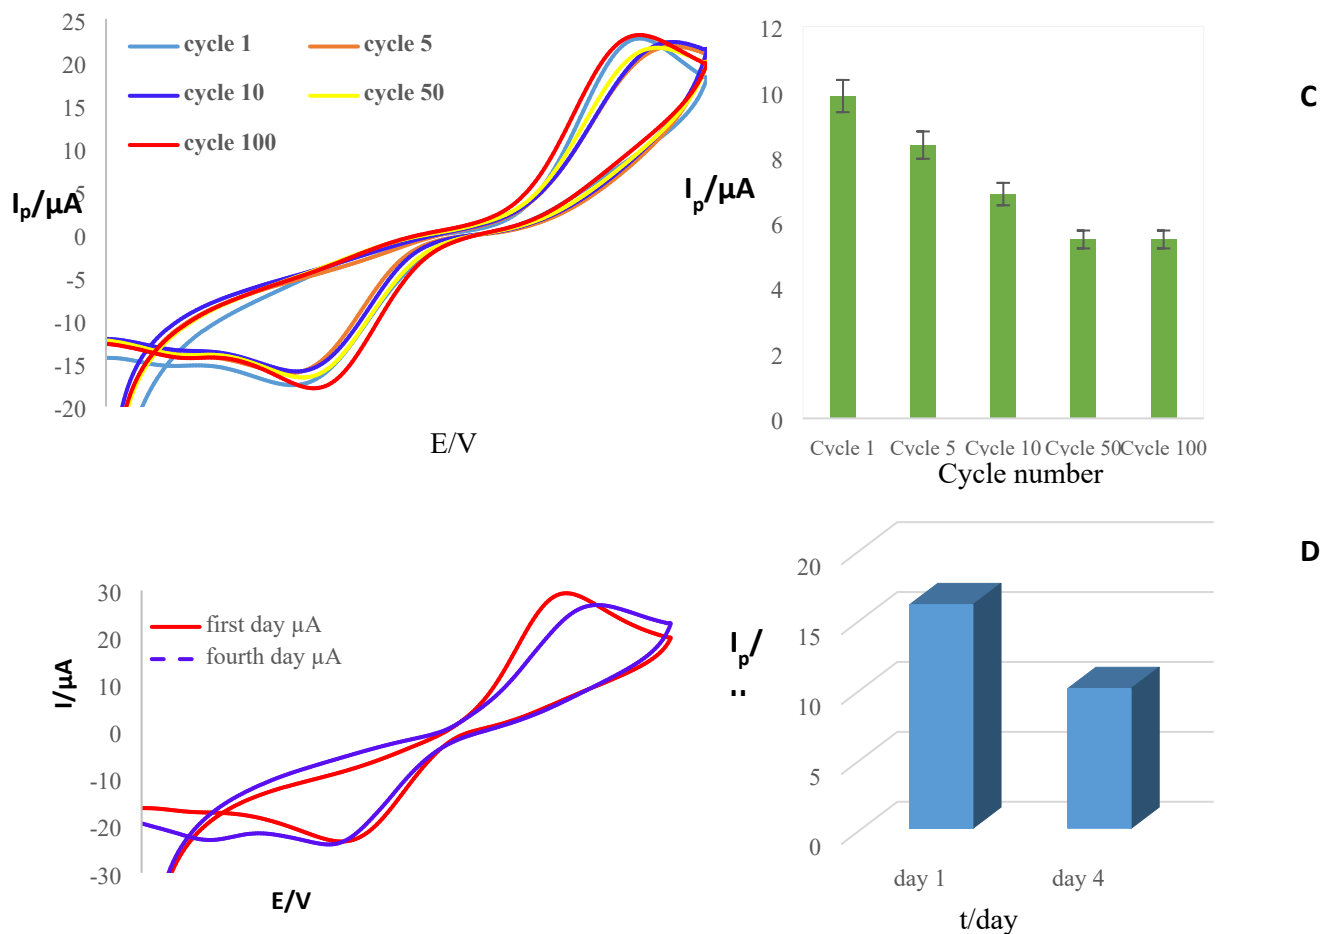

**Figure S3.** A) Reproducibility of immunosensor in 0.01M  $[\text{Fe}(\text{CN})_6]^{3-/4-}/\text{KCl}$  solution (as supporting electrolyte) in a potential range of -1 to +1 V and scan rate of 100 mV/s. B) Inter-day stability of AuNCs on the surface of GC electrode. C) CVs of immunosensor in different cycle number and related histogram D) Intraday stability of Ab/AuNCs/GC electrode. ( $n=3$ ,  $Sd=2.85$ ).

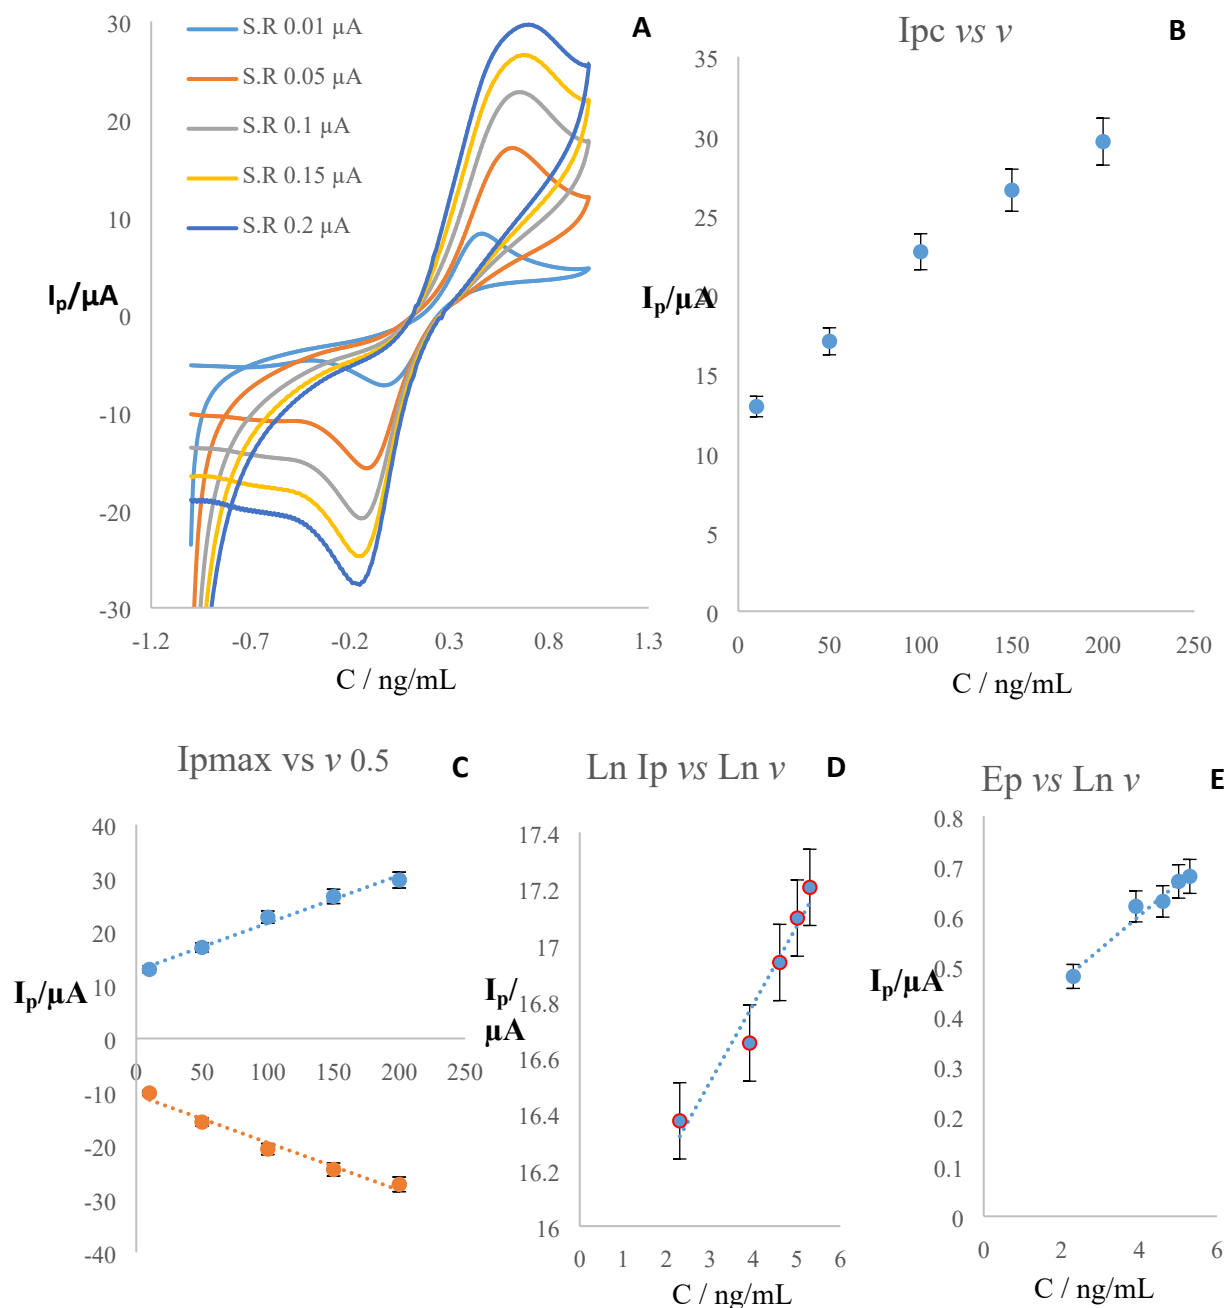

**Figure S4.** **A)** CVs of AuNCs/GC electrode in different scan rates (10, 50, 100, 150 and 200 mV/s). **B)** Variations of oxidation peak current versus different sweep rate. **C)** Calibration curve of oxidation peak current versus square root of different sweep rate. **D)** Calibration curve of Neperian logarithm of oxidation peak current versus Neperian logarithm of scan rate. **E)** Calibration curve of reduction peak position versus sweep rate in term of Neperian logarithm.
